# Supplementary material for: Use of an antiviral mouthwash as an additional barrier measure in the SARS-CoV-2 transmission in adults with asymptomatic to mild COVID-19: A multicenter, randomized, double-blind controlled trial
Source: Research Square preprint supplement (doi:10.21203/rs.3.rs-315468/v1), 2021-03-10
Supplement: Supplementary file 1 [file aa3e1953266ffdfef89d334a.docx]

**Appendix**

**Fig. S1 - Temporal organization of mouthwashes and saliva sampling---------------------------------------** 2

**Materials and Methods-------------------------------------------------------------------------------------------------** 3

**Table S1 - RT-PCR for the detection of SARS-CoV-2: primers and probes used ---------------------------** 4

**Table S2 - Baseline characteristics of the study groups- ---------------------------------------------------------** 5

**Table S3 – Salivary SARS-CoV-2 load from the day 1 T1 to day 7 for the CDCM**

**and placebo groups------------------------------------------------------------------------------------------------------** 6

**Fig. S2 – Evolution of SARS-CoV-2 salivary load from the day 1 T1 to day 7 for the CDCM**

**and placebo groups------------------------------------------------------------------------------------------------------** 7

**Fig. S1 - Temporal organization of mouthwashes and saliva sampling**

**Materials and Methods**

**Participants and source of data**

The patients were COVID-19 confirmed cases that correspond to a positive SARS-CoV-2 RT-PCR on nasopharyngeal samples (performed by an accredited laboratory). Clinical, biological and radiological data were carefully recorded from computerized medical records.

**Temporal organization of mouthwashes and saliva sampling**

The temporal organization is summarized in the Supplementary Fig. S1. The day 1, at 9 a.m. (Time 1), the patient collected the first saliva sample and then proceeded with his first mouthwash either with the mouthwash containing ß-cyclodextrin and citrox (bioflavonoids) or with the placebo. The second saliva sample was collected at 1 pm. (Time 2) and one hour later, at 2 p.m., the patient performed a mouthwash. Then, at 6 p.m. (Time 3), the patient collected his saliva and at 7 p.m., he proceeded to a mouthwash. For the next 6 days, the patient performed 3 daily mouthwashes at 9 a.m., 2 p.m. and 7 p.m. and collected his saliva once a day at 3 p.m.

**RNA extraction and real-time RT-PCR**

RNA extraction was performed with the Extraction NucliSens easyMAG instrument (bioMérieux, Marcy-l’Etoile, France) using manufacturer's instructions. RNA was extracted from 200 μL of specimen and eluted in 50 μL of water and used as a template for real-time (rt) RT-PCR. A 25 μL reaction contained 5 μL of RNA, 1 μL of RdRp-IP2 forward primer (0·4 μM), 1 μL of RdRp-IP2 reverse primer (0·4 μM), 1 μL of RdRp-IP4 forward primer (0·4 μM), 1 μL of RdRp-IP4 reverse primer (0·4 μM), 12·5 μL of 2X reaction buffer provided with the Superscript III one step RT-PCR system with Platinum Taq Polymerase (Invitrogen, Darmstadt, Germany; containing 0·4 mM of each dNTPs and 3 mM magnesium sulfate), 1 μL of Superscript III RT/Platinum Taq Mix, 0·4 μL of a 50 mM magnesium sulfate solution (Invitrogen). The rt RT-PCR was performed on a Quant Studio 5 (Thermofisher, Dardilly, France) with the following conditions: 55°C for 10 min (reverse transcription), followed by 95°C for 2 min and then 45 cycles of 95°C for 3 s, 58°C for 30 s. Each RT-PCR run included in addition of unknown samples: three negatives samples bracketing unknown samples during RNA extraction, two positive controls and one negative amplification control. When a sample was positive with RdRp-IP4, quantification of the number of RNA copies was done according to a scale ranging from 102 to 106 copies/μL. All positive saliva samples were quantified and expressed as number of RNA copies/mL.

**Primers and probes**

Primer and probe sequences (Eurofins, Genomics, Germany) are shown in Supplementary Table S1. Based on the first sequences of SARS-CoV-2 available on the GISAID database on January 11, 2020, primers and probes (nCoV_IP2 and nCoV_IP4) were designed to target the RdRp gene spanning nt 12621-12727 and 14010-14116 positions according SARS-CoV, NC_004718).

**References**

1. Corman VM, Landt O, Kaiser M, Molenkamp R, Meijer A, Chu DK, et al. Detection of 2019 novel coronavirus (2019-nCoV) by real-time RT-PCR. Euro Surveill. 2020;25(3).

**Table S1 - RT-PCR for the detection of SARS-CoV-2: primers and probes used**

| **Name** | **Sequences (5’-3’)** | **PCR**  **product** | **Ref** |
| --- | --- | --- | --- |
| ***RdRp gene / nCoV_IP2*** |  |  |  |
| nCoV_IP2-12669Fw | ATGAGCTTAGTCCTGTTG | 108 pb | CNR |
| nCoV_IP2-12759Rv | CTCCCTTTGTTGTGTTGT | CNR |
| nCoV_IP2-12669bProbe(+) | [5']HEX - AGATGTCTTGTGCTGCCGGTA - [3']BHQ-1 | CNR |
| ***RdRp gene / nCoV_IP4*** |  |  |  |
| nCoV_IP4-14059Fw | GGTAACTGGTATGATTTCG | 107 pb | CNR |
| nCoV_IP4-14146Rv | CTGGTCAAGGTTAATATAGG | CNR |
| nCoV_IP4-14084Probe(+) | [5']Fam - TCATACAAACCACGCCAGG - [3']BHQ-1 | CNR |

CNR: National Reference Center for Respiratory Viruses, Institut Pasteur, Paris, France

**Table S2 - Baseline characteristics of the study groups**

|  | **CDCM** | **Placebo** | **Overall** | **p-value** |
| --- | --- | --- | --- | --- |
| Gender, n/N (%) |  |  |  | 0·700a |
| Male | 36/75 (48·00%) | 34/78 (43·59%) | 70/153 (45·75%) |  |
| Female | 39/75 (52·00%) | 44/78 (56·96%) | 83/153 (54·25%) |  |
| Age (years) | N=75 | N=77 | N=152 |  |
| mean ± SD | 43·81 ±15·1 | 43·97 ±16·17 | 43·89 ±15·55 | 0·949b |
| median [IQR] | 44 [32·5 - 53·5] | 42 [30 - 56] | 43 [30·75 - 55] | 0·994c |
| No comorbidity, n/N (%) | 55/68 (80·88%) | 57/75 (76·00%) | 112/143 (78·32%) | 0·614 a |
| Diagnosis-inclusion time (days), | N=74 | N=73 | N=147 |  |
| mean ± SD | 3·82 ±4·37* | 2·9 ±1·57 | 3·37 ±3·31* |  |
| median [IQR] | 4 [2 - 4·75] | 3 [2 - 4] | 3 [2 - 4] | 0·032c |
| Initial place of care, n/N (%) |  |  |  | 1·000a |
| Home | 69/72 (95·83%) | 70/74 (94·59%) | 139/146 (95·21%) |  |
| Hospital | 3/72 (4·17%) | 3/74 (4·05%) | 6/146 (4·11%) |  |
| Nursing care | 0/72 (0·00%) | 1/74 (1·35%) | 1/146 (0·68%) |  |
| Diagnostic delay-day 1 (days) | N=74 | N=74 | N=148 |  |
| mean ± SD | 4·38 ±3·53* | 3·65 ±1·46 | 4·01 ±2·71* |  |
| median [IQR] | 4 [3 - 5] | 4 [3 - 5] | 4 [3 - 5] | 0·059c |
| Delay clinical signs-day 1 (days) | N=64 | N=71 | N=135 |  |
| mean ± SD | 5·59 ±1·59* | 5·62 ±1·59 | 5·61 ±1·58* |  |
| median [IQR] | 6 [4·75 - 7] | 6 [5 - 7] | 6 [5 - 7] | 0·884c |
| Delay PCR-day 1 (days) | N=73 | N=74 | N=147 |  |
| mean ± SD | 4·1 ±1·48* | 3·8 ±1·38 | 3·95 ±1·44* |  |
| median [IQR] | 4 [3 - 5] | 4 [3 - 5] | 4 [3 - 5] | 0·146c |

aPearson's Chi-square, bStudent’s t-test, cMann-Whitney test. *Shapiro test: Normality hypotheses rejected. CDCM: ß-cyclodextrin and citrox mouthwash

**Table S3 – Salivary SARS-CoV-2 load from the day 1 T1 to day 7 for the CDCM and placebo groups**

|  | **CDCM** | **Placebo** | **p-valuea** |
| --- | --- | --- | --- |
| Day 1 T1 | N=76 | N=78 |  |
| mean ± SD | 3·74 ±2·03 | 3·86 ±2·26 |  |
| median (min; max) [IQR] | 4·14 (0 ; 6·71) [2·95 - 5·15] | 4·04 (0 ; 10·19) [2·95 - 5·14] | 0·808 |
| Day 1 T2 | N=76 | N=78 |  |
| mean ± SD | 2·99 ±1·91 | 3·41 ±2·17 |  |
| median (min; max) [IQR] | 3·61 (0 ; 5·81) [1·6 - 4·37] | 3·92 (0 ; 8·07) [1·92 - 4·94] | 0·173 |
| Day 1 T3 | N=75 | N=77 |  |
| mean ± SD | 2·88 ±2·06 | 3·19 ±2·29 |  |
| median (min; max) [IQR] | 3·17 (0 ; 7) [0 - 4·31] | 3·34 (0 ; 8·16) [0 - 4·91] | 0·368 |
| Day 2 | N=75 | N=78 |  |
| mean ± SD | 2·58 ±2·11 | 2·83 ±2·18 |  |
| median (min; max) [IQR] | 3·07 (0 ; 7·43) [0 - 4·16], | 3·42 (0 ; 7·96) [0 - 4·48] | 0·451 |
| Day 3 | N=75 | N=77 |  |
| mean ± SD | 2·24 ±1·83 | 2·43 ±2·11 |  |
| median (min; max) [IQR] | 2·58 (0 ; 5·65) [0 - 3·58] | 2·79 (0 ; 7·31) [0 - 3·87] | 0·578 |
| Day 4 | N=73 | N=78 |  |
| mean ± SD | 2·02 ±1·96 | 2·1 ±2·24 |  |
| median (min; max) [IQR] | 2·2 (0 ; 6·66) [0 - 3·52] | 1·6 (0 ; 7·94) [0 - 3·87] | 0·896 |
| Day 5 | N=75 | N=74 |  |
| mean ± SD | 1·59 ±1·87 | 1·94 ±2·19 |  |
| median (min; max) [IQR] | 0 (0 ; 6·11) [0 - 2·99] | 0·68 (0 ; 7·36) [0 - 3·7] | 0·363 |
| Day 6 | N=73 | N=72 |  |
| mean ± SD | 1·53 ±1·77 | 1·76 ±1·95 |  |
| median (min; max) [IQR] | 0 (0 ; 7·32) [0 - 2·72] | 1·48 (0; 7·29) [0 - 3·4] | 0·429 |
| Day 7 | N=73 | N=68 |  |
| mean ± SD | 1·23 ±1·76* | 1·52 ±1·96 |  |
| median (min; max) [IQR] | 0 (0; 6·12) [0 - 2.65] | 0 (0; 7·44) [0 - 3·05] | 0·406 |

aMann-Whitney test of the differences with a unilateral alternative hypothesis (H1 CDCM < Placebo). CDCM: ß-cyclodextrin-citrox mouthwash

**Fig. S2 – Evolution of SARS-CoV-2 salivary load from the day 1 T1 to day 7 for the CDCM and placebo groups**

(A-B) Evolution for all the patients. (C-D) Evolution for patients for patients with a viral load greater than 2·95 log10 copies/mL at day 1 time 1. (E-F) Evolution for patients for patients with a viral load greater than 4·12 log10 copies/mL at day 1 time 1. (G-H) Evolution for patients for patients with a viral load greater than 5·16 log10 copies/mL at day 1 time 1. Shaded areas are 90% CIs.
